# Supplementary material for: Influences of Ru and ZrO2 interaction on the hydroesterification of styrene
Source: Royal Society of Chemistry journal article supplement (doi:10.1039/d4ra00054d), 2024-01-01
Supplement: d4ra00054d1.pdf [file d4ra00054d1.pdf]

## Supporting Information

### **The interaction between Ru and ZrO<sub>2</sub> delivers a significant impact on the hydroesterification of styrene**

Fei Xue,<sup>‡a</sup> Fang Wang,<sup>‡a</sup> Min Liao,<sup>b</sup> Mengli Liu,<sup>a</sup> Qunye Hong,<sup>c</sup> Zhen Li,<sup>\*a</sup> Chungu Xia,<sup>\*a</sup> Jinbang Wang<sup>\*c</sup>

<sup>a</sup>State Key Laboratory for Oxo Synthesis and Selective Oxidation, Lanzhou Institute of Chemical Physics, Chinese Academy of Sciences, Lanzhou 730000, P.R. China.

<sup>b</sup>Ganzhou Branch of Jiangxi Tobacco Corporation, Ganzhou 341000, P.R. China.

<sup>c</sup>Zhengzhou Tobacco Research Institute of CNTC, Zhengzhou 450001, P.R. China.

<sup>‡</sup> These authors contributed equally to this work.

**Table S1** Physicochemical properties of ZrO<sub>2</sub> calcined at different temperature

| Entry | Supports               | S <sub>BET</sub> <sup>a</sup> (m <sup>2</sup> ·g <sup>-1</sup> ) | D <sub>p</sub> <sup>b</sup> (nm) | V <sub>p</sub> <sup>c</sup> (cm <sup>3</sup> ·g <sup>-1</sup> ) |
|-------|------------------------|------------------------------------------------------------------|----------------------------------|-----------------------------------------------------------------|
| 1     | ZrO <sub>2</sub> (400) | 81                                                               | 8.5                              | 0.241                                                           |
| 2     | ZrO <sub>2</sub> (500) | 60                                                               | 15.4                             | 0.270                                                           |
| 3     | ZrO <sub>2</sub> (600) | 34                                                               | 15.8                             | 0.215                                                           |

Notes: <sup>a</sup> specific surface area; <sup>b</sup> pore size; <sup>c</sup> total pore volume.

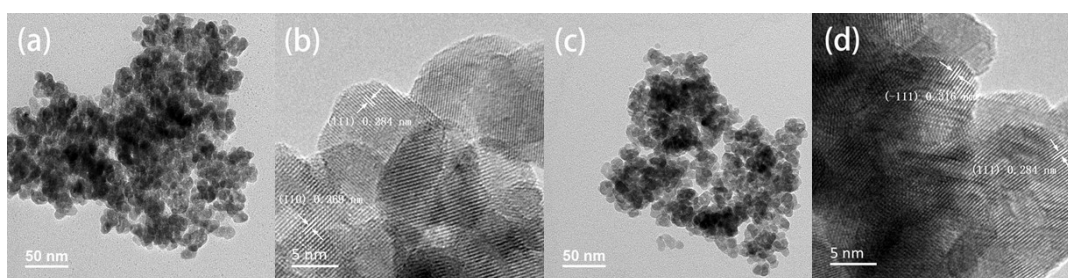

**Fig. S1** TEM of reduced catalysts: (a) low- and (b) high-magnification images of 1%Ru(acac)/ZrO<sub>2</sub>(400); (c) low- and (d) high-magnification images of 1%Ru(Cl)/ZrO<sub>2</sub>(400).

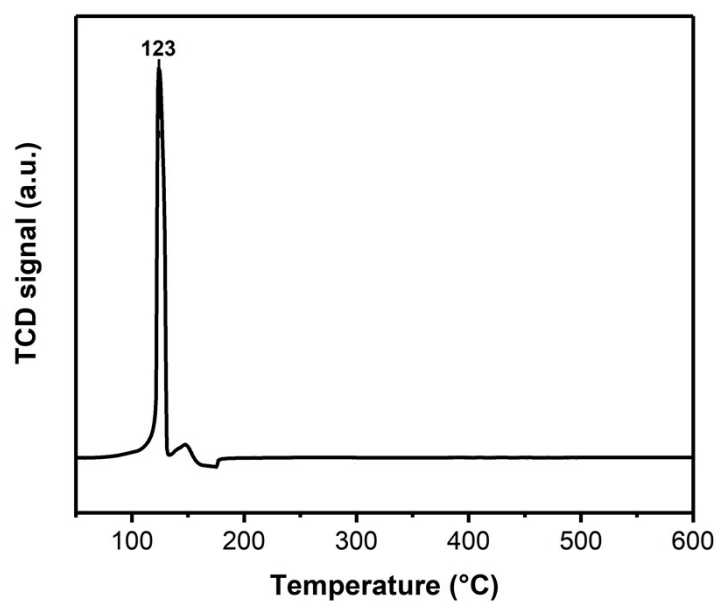

**Fig. S2** TPR of ruthenium (III) chloride calcined at 400 °C

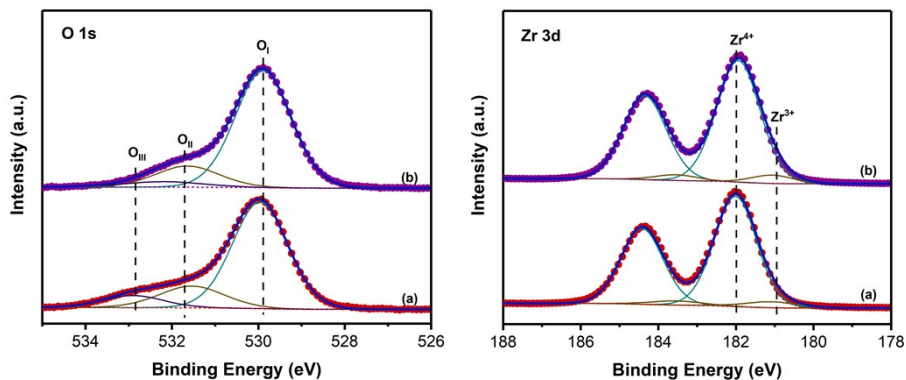

**Fig. S3** XPS of O 1s (left) and Zr 3d (right) of the reduced sample: (a) 1%Ru(acac)/ZrO<sub>2</sub>(400); (b) 1%Ru(Cl)/ZrO<sub>2</sub>(400). O<sub>I</sub>, O<sub>II</sub> and O<sub>III</sub> are oxygen in the ZrO<sub>2</sub> framework, oxygen vacancies, and adsorbed water, respectively.

**Table S2** Chemical compositions of reduced samples<sup>a</sup>

| Catalysts                         | Ru <sup>δ+</sup> /(Ru <sup>0</sup> +Ru <sup>δ+</sup> ) | Zr <sup>3+</sup> /Zr <sup>4+</sup> | O <sub>II</sub> /O <sub>I</sub> |
|-----------------------------------|--------------------------------------------------------|------------------------------------|---------------------------------|
| 1%Ru(acac)/ZrO <sub>2</sub> (400) | 0.35                                                   | 0.07                               | 0.23                            |
| 1%Ru(Cl)/ZrO <sub>2</sub> (400)   | 0.51                                                   | 0.07                               | 0.22                            |

<sup>a</sup> Calculated from XPS.

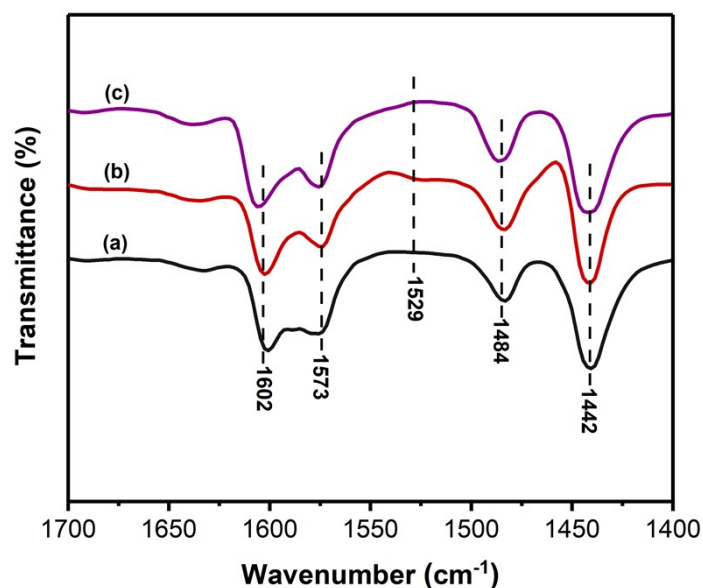

**Fig. S4** Pyridine-IR of the sample: (a) ZrO<sub>2</sub>(400); (b) 1%Ru(acac)/ZrO<sub>2</sub>(400); (c) 1%Ru(Cl)/ZrO<sub>2</sub>(400).

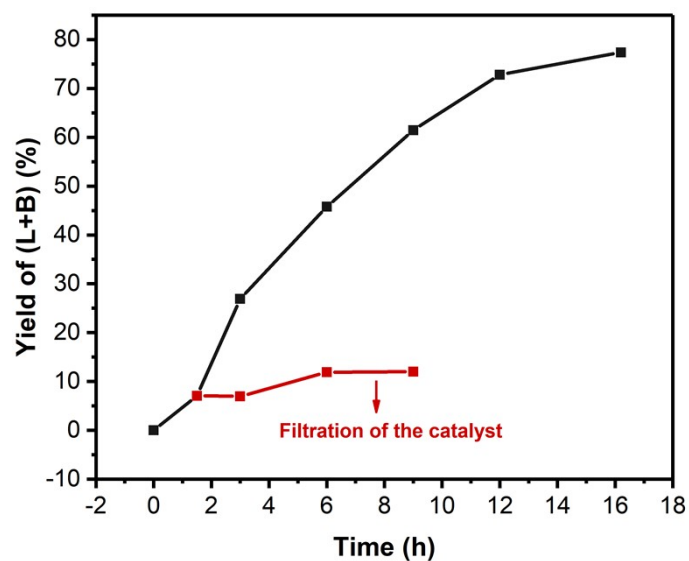

**Fig. S5** Filtration reaction. Reaction conditions: 2 mmol styrene, styrene/Ru = 83, 0.1 g n-decane, 5 ml methanol, P = 0.5 MPa, T = 160 °C.

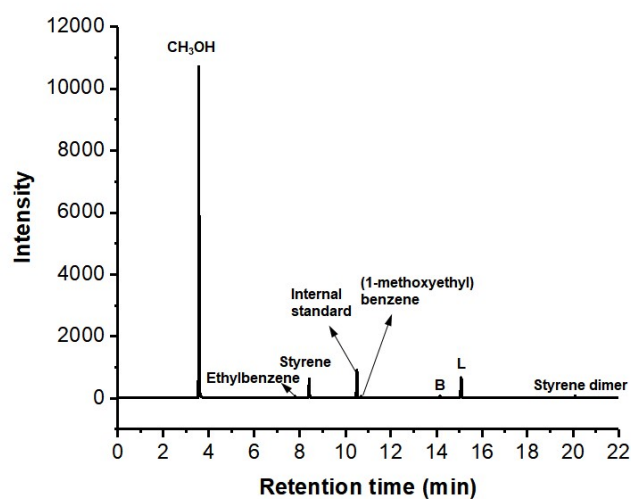

**Fig. S6** GC-FID peak analysis of styrene hydroesterification over 1%Ru(Cl)/ZrO<sub>2</sub>(400). Reaction conditions: 2 mmol styrene, styrene/Ru = 83, 0.1 g n-decane, 5 mL methanol, P = 0.5 MPa, T = 160 °C, t = 6 h.

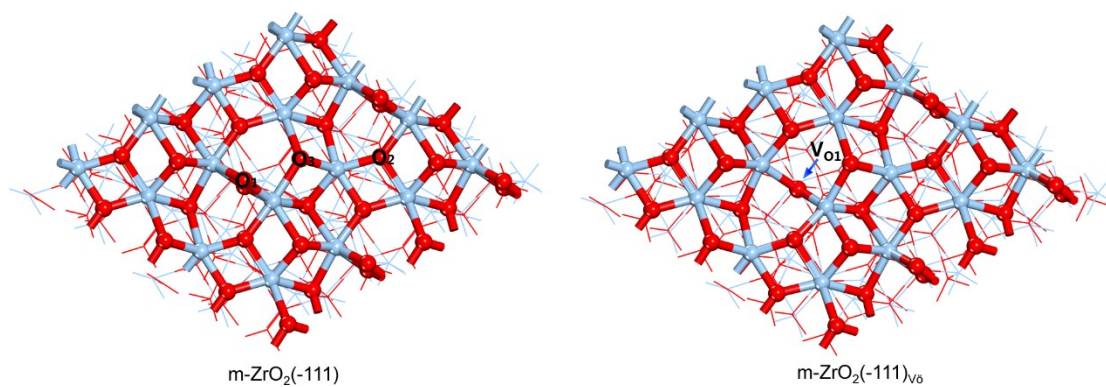

**Fig. S7** The optimized geometries of m-ZrO<sub>2</sub>(-111) and m-ZrO<sub>2</sub>(-111)<sub>V<sub>O</sub></sub> with the lowest energy.

**Table S3** Formation energies  $\Delta E_{V_O}$  (in eV) of m-ZrO<sub>2</sub>(-111) surface with oxygen vacancies

| Entry | Oxygen vacancy  | E (eV)       | $\Delta E_{V_O}$ (eV) |
|-------|-----------------|--------------|-----------------------|
| 1     | V <sub>O1</sub> | -132583.5075 | 5.95                  |
| 2     | V <sub>O2</sub> | -132583.3829 | 6.07                  |
| 3     | V <sub>O3</sub> | -132583.2531 | 6.20                  |

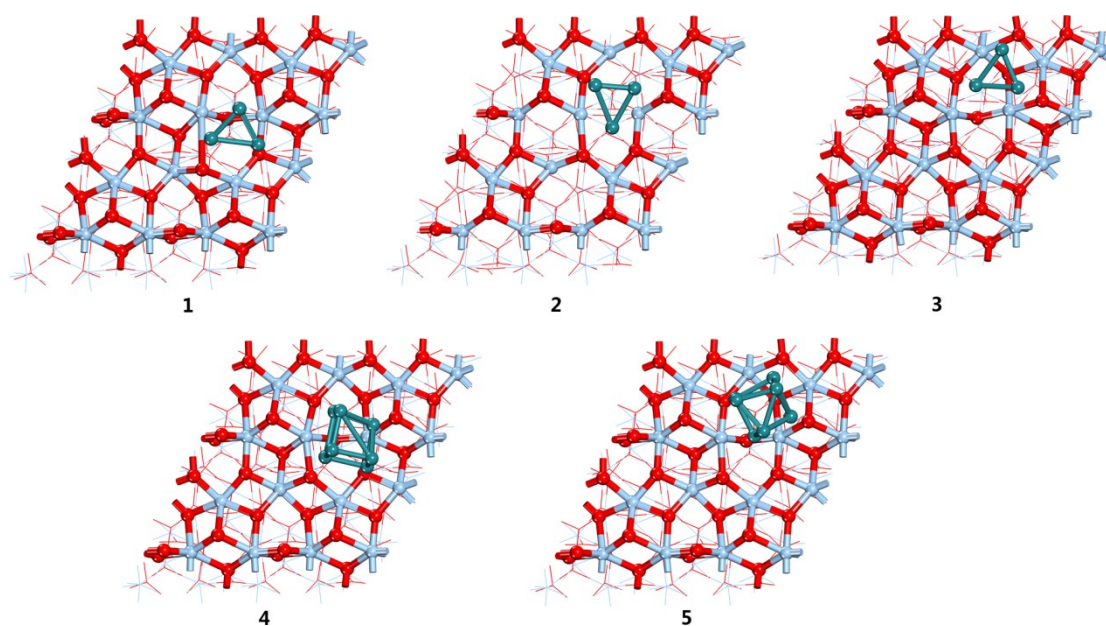

**Fig. S8** The optimized geometries of Ru<sub>3</sub> and Ru<sub>7</sub> supported on m-ZrO<sub>2</sub>(-111)<sub>V<sub>O</sub></sub>.

**Table S4** Adsorption energies of Ru<sub>3</sub> and Ru<sub>7</sub> clusters on m-ZrO<sub>2</sub>(-111)<sub>V<sub>8</sub></sub> surface with oxygen vacancies

| Model catalysts                                                     | Optimized structures | E (eV)       | ΔE (eV) |
|---------------------------------------------------------------------|----------------------|--------------|---------|
| Ru <sub>3</sub> /m-ZrO <sub>2</sub> (-111) <sub>V<sub>8</sub></sub> | 1                    | -140385.3396 | -7.38   |
|                                                                     | 2                    | -140384.4597 | -6.50   |
|                                                                     | 3                    | -140384.3323 | -6.37   |
| Ru <sub>7</sub> /m-ZrO <sub>2</sub> (-111) <sub>V<sub>8</sub></sub> | 4                    | -150788.9183 | -8.66   |
|                                                                     | 5                    | -150787.5316 | -7.27   |
